# Supplementary material for: The ciliary kinesin KIF7 controls the development of the cerebral cortex by acting differentially on SHH signaling in dorsal and ventral forebrain
Source: eLife. 2025 Sep 16;13:RP100328. doi: 10.7554/eLife.100328 (PMC12440355; doi:10.7554/eLife.100328)
Supplement: Source data 1. [file elife-100328-data1.xlsx]

## Sheet: Fig.1C4 Ventricle surface
	Ventricle surface WT						Ventricle surface Kif7 -/-
rostral	0.363763	0.359685	0.4031	0.794446	0.554628	0.358519	0.821424	0.817491	0.937818	1.02601	0.643025	0.427438
rostro-median	0.365511	0.403863	0.38001	0.794446	0.488954	0.361708	0.717111		0.654896	0.885359	0.53575	0.585819
median (caudal)	0.097311	0.244728	0.30538			0.136872	0.399288	0.46856	0.47919	0.791154	0.199532

## Sheet: Fig.1C4 Cortical thicknes
	Cortex thickness WT			Cortex thickness Kif7 -/-
Lateral	375.427	407.215	444.576	257.449	256.243	284.162	360.229
Dorso Lateral	261.72	278.319	312.237	136.302	173.291	166.671	234.732
Dorsal	191.21	203.014	259.296	115.509	119.306	149.89	166.315

## Sheet: Fig.1C4 brain width
	Brain width WT						Brain width Kif7 -/-
rostral	1.92471	2.16624	2.29571	2.41274	2.41647	2.06166	2.39406	2.32684	2.2372	2.49491	2.14196	1.6807
rostro-median	2.17122	2.33804	2.58454	2.83852	2.72647	2.25961	2.5696	2.45756	2.34551	2.68539	2.29571	1.82636
median (caudal)	2.27828	2.45756	2.68165	2.91321		2.3231	2.65924	2.64804	2.42768	2.59948	2.36792

## Sheet: Fig.1C4 Brain height
	Brain heigth WT						Brain heigth Kif7 -/-
rostral	1.24994	1.37257	2.00937	1.77034	1.73672	1.62094	1.58733	1.59106	1.59106	1.64148	1.48649	1.77407
rostro-median	1.62094	1.82636	1.82636	1.94214	1.92347	1.69564	1.77407	1.64709	1.77034	1.81142	1.55122	2.31937
median (caudal)	1.88238	1.84504	2.0019	2.03925		1.8301	1.88238		1.88238	1.93467	1.65829

## Sheet: Fig.2B
	WT	Kif7 -/-
cortex	9.30073	4.16856
	9.59004	2.35608
	9.71474	0.982873
	9.88446	1.00804
MGE	0.120752	0.136982
	0.986831	0.996254
	0.11043	0.98079
	0.107652	0.914157

## Sheet: Fig.5A2
	WT cIN stream length (µm)				Kif7 -/- cIN stream length (µm)
Deep	1263.62	1235.14	1328.31	1441.97	915.513	657.61	1125.16
Superficial	1552.72	1501.37	1609.26	1583.27	1101.79	833.522	1340.05

## Sheet:  Fig.5B2
Distance (µm)	Tomato fluorescence WT				Tomato fluorescence Kif7 -/-
0	0	0	0	0	0	1.41058	5.89614	4.27941e-15
1	1.71205	4.97896	4.22461	1.48486	0	2.72395	7.29936	0.766711
2	3.71911	5.79663	8.74073	2.88558	0.744766	4.54163	8.89487	1.56989
3	5.92932	6.48931	13.455	4.17958	2.39706	5.85301	10.2576	2.46125
4	7.95695	7.09603	16.795	5.75333	4.01641	7.48135	11.4656	3.37496
5	9.57504	7.71284	19.2341	7.184	5.93992	9.03937	12.4461	4.48745
6	10.4718	8.30302	20.3504	8.25021	7.9248	10.9427	13.1956	5.39996
7	10.7604	8.7631	21.3792	9.03973	9.93317	12.7441	13.7405	6.31557
8	11.0626	9.19218	21.9549	9.96606	12.4165	14.7581	14.2687	7.27942
9	11.1669	9.57605	22.4328	10.5063	15.1091	16.4787	14.8058	7.86463
10	11.3249	10.0724	22.6906	10.9654	17.651	17.4791	15.4108	8.51346
11	11.4488	10.4623	22.7727	11.3902	19.8264	18.3301	15.8722	8.98282
12	11.462	10.8568	22.7201	11.6355	21.3272	18.0997	16.5426	9.38843
13	11.5623	11.2839	23.1673	11.7507	22.4416	17.7488	17.3104	9.99725
14	11.5093	11.5261	23.2252	11.9789	23.2041	17.5656	17.8814	10.5641
15	11.5977	11.6908	23.2945	11.9352	23.6037	16.9763	18.2911	11.0668
16	11.6651	11.8157	23.6914	12.0232	23.9598	16.624	18.6635	11.609
17	11.7603	11.9094	23.9353	11.8902	24.1479	16.3006	18.9509	12.1584
18	12.08	12.0301	24.0775	11.9986	24.3235	16.2284	19.0509	12.6996
19	12.1768	12.158	24.5482	12.1066	24.3085	16.1533	19.2543	13.2335
20	12.1882	12.1442	25.0952	12.2654	24.3407	16.1415	19.5635	13.7489
21	12.459	12.208	25.2325	12.2469	24.503	16.1424	19.7438	13.9026
22	12.4883	12.3386	25.7336	12.1362	24.7584	16.0079	20.0756	14.2591
23	12.6013	12.3841	25.9574	12.2379	24.7752	16.2667	20.4379	14.471
24	12.5418	12.5475	26.3632	12.4211	24.9077	16.2251	20.7791	14.4042
25	12.5034	12.5834	27.0487	12.3898	24.9393	16.0339	20.943	14.4634
26	12.5462	12.8061	27.973	12.4576	24.9787	15.9254	21.2103	14.4446
27	12.4487	13.3346	28.6254	12.6342	24.9107	16.2865	21.2882	14.4105
28	12.3292	13.6964	29.2416	12.6371	24.7643	16.0857	21.449	14.3663
29	12.3046	14.0011	29.9836	12.8749	24.6001	16.0019	21.5465	14.3373
30	12.2	14.3498	30.5356	13.0624	24.6712	16.3043	21.5288	14.4636
31	12.0037	14.7401	31.5176	13.2605	24.4573	16.5375	21.576	14.5006
32	12.0285	15.169	32.2636	13.6219	24.3422	17.0774	21.7882	14.7326
33	12.2077	15.4951	32.4982	13.5742	24.5641	17.2755	21.9063	15.0591
34	12.5661	15.7859	33.0183	13.885	24.5988	17.7678	22.1155	15.5932
35	12.7418	16.0913	33.0656	14.4928	24.7368	18.5158	22.544	16.0156
36	13.2592	16.1711	33.4406	15.0448	24.8526	19.4202	22.6417	16.4901
37	13.7545	16.1277	33.1538	15.5065	25.0174	20.0845	22.7489	16.9102
38	14.3968	16.0419	32.3653	16.3173	25.0589	20.4639	22.8184	17.256
39	14.9107	15.8927	32.2334	17.0521	25.2462	20.6923	23.0763	17.7854
40	15.4332	15.6249	32.1569	17.3158	25.2918	21.1273	23.3308	17.7374
41	15.7346	15.4435	32.1567	17.474	25.592	20.6466	23.6945	17.5225
42	15.8241	15.1116	32.0205	17.5236	25.8882	20.4272	24.1172	17.5636
43	15.6267	14.6887	31.4587	17.2653	26.2668	20.0158	24.7167	17.5671
44	15.2144	14.3127	31.102	17.0137	26.6599	19.4675	25.1747	17.6237
45	14.8715	13.9989	30.5634	16.7211	26.8629	19.3895	26.0724	17.5421
46	14.3749	13.7484	30.1921	16.4369	26.969	19.5149	26.9317	17.4344
47	14.1799	13.7686	29.3482	15.948	26.8048	19.79	27.6632	17.4552
48	14.2825	13.9095	28.3286	15.1599	26.5244	19.2545	28.5229	17.5177
49	14.6325	14.1174	27.5799	14.6294	26.2038	19.2878	29.3517	17.7034
50	15.0928	14.1827	27.2162	14.5047	25.909	19.6421	30.0191	17.962
51	15.2933	14.4326	27.0906	14.6975	25.8704	19.8058	30.4605	18.5839
52	15.3254	14.723	27.0591	14.9749	25.8136	19.7	30.9014	18.9235
53	15.3732	14.873	27.4876	14.8498	25.8744	19.5895	31.3321	19.083
54	15.4571	14.9733	28.5423	14.8456	25.8067	19.3551	31.949	19.4029
55	15.3765	15.1475	30.07	14.806	25.7477	19.1294	32.7227	19.7519
56	15.3539	15.3612	31.2413	14.8959	25.8382	19.0615	33.7092	19.9463
57	15.4723	15.67	32.2582	15.2113	25.9256	19.1014	34.6082	19.7506
58	15.6317	16.0294	32.391	15.5601	26.1892	19.012	35.5241	19.634
59	15.7038	16.1496	32.2537	16.101	26.6727	18.6187	36.245	19.4995
60	15.8081	16.3385	31.2529	16.837	27.4672	18.3477	37.036	19.593
61	15.9511	16.4019	30.7297	17.7837	28.5209	17.8311	37.819	19.9033
62	16.0032	16.4093	30.7633	18.5944	30.3124	17.3382	38.4781	20.0378
63	16.2049	16.4833	30.6591	19.2552	32.5306	17.2635	39.1992	20.0867
64	16.3081	16.3422	30.9891	19.7311	34.4498	17.5143	39.7291	20.2812
65	16.1018	16.5998	31.792	20.1674	36.1963	18.1558	40.0603	20.5598
66	15.8754	16.5571	32.9404	20.2556	37.7613	19.5773	40.1822	21.2384
67	16.0558	16.8418	34.0616	19.545	38.4914	21.5001	40.8012	21.9893
68	16.5097	17.3129	35.1773	18.7593	38.3842	23.3606	42.2575	22.7207
69	17.4625	17.8097	35.41	18.2961	37.7332	25.6205	44.6237	23.4344
70	18.5648	18.3104	35.6532	18.7798	37.1041	28.548	47.4473	23.7548
71	19.5193	18.8224	35.6116	19.8144	37.9114	30.8758	49.5438	23.988
72	20.5108	19.0637	35.7827	21.2127	39.596	32.3671	50.7502	24.0239
73	21.2873	19.0642	36.2987	22.6206	41.4238	34.4445	51.9382	23.9725
74	21.9368	19.2089	37.1035	24.1053	42.0352	36.0345	54.0327	24.0959
75	22.7693	19.0962	37.9335	25.3132	42.2804	37.5973	56.2531	24.5465
76	23.4357	18.8346	39.4742	26.6809	42.4074	39.3206	58.5831	25.1162
77	23.9174	18.8376	41.5001	27.8005	43.073	39.8331	60.2717	25.8158
78	24.2815	19.3373	44.2193	28.3226	44.4437	38.9767	60.3564	26.5914
79	24.962	20.1471	46.7814	28.8505	45.9953	38.8116	60.0721	27.3185
80	25.4415	20.8653	48.9181	29.4769	48.2351	39.9977	60.2164	27.6146
81	25.6053	20.9094	51.0675	30.2752	50.4866	42.5979	61.4225	27.7282
82	25.4073	20.7225	53.2548	31.0151	52.2341	46.0924	63.4032	27.8905
83	24.912	20.3009	54.068	32.1532	54.0074	51.2923	66.368	28.2937
84	24.6369	20.0785	54.8615	33.5293	54.9857	58.0072	70.1689	29.0538
85	24.8939	20.1908	56.5579	34.6091	55.0021	64.2264	74.0981	29.8891
86	25.3111	20.8562	59.7663	35.7029	53.9985	69.2355	77.6511	31.1325
87	26.4896	21.5901	64.2797	36.7319	52.5801	74.1155	80.4875	32.9361
88	27.942	22.0893	68.9142	37.46	53.7863	77.4762	82.3265	35.2392
89	29.4393	22.5937	73.223	38.5598	57.7542	78.1841	82.3096	37.4084
90	30.8872	23.2817	76.575	39.7825	62.1728	75.1919	81.6971	39.3366
91	32.6053	24.2736	77.5925	40.9371	66.4188	72.4837	81.9982	40.866
92	33.834	24.9188	77.4591	42.023	69.3701	70.7814	83.1336	42.6593
93	34.8302	25.0716	79.3358	43.2611	70.7095	70.6483	84.3988	44.49
94	36.5266	25.0226	80.2863	43.9587	72.2284	72.133	85.3386	46.1149
95	39.057	24.7768	80.5574	44.4231	73.8784	74.801	86.4457	47.8257
96	41.3953	25.0048	81.0607	45.8475	74.2883	79.9214	86.511	49.7942
97	43.274	25.1691	82.1752	47.5597	74.2012	86.1474	85.2951	52.1508
98	44.9927	25.3372	84.1492	49.2226	73.845	92.0344	84.364	54.6803
99	46.2213	25.5962	87.6118	50.8822	73.7746	97.7767	84.4803	57.0296
100	47.7736	26.5444	92.1142	52.6755	75.2204	100	85.9419	59.0488
101	49.8675	27.588	97.4272	55.902	77.1751	99.0706	87.8076	60.7966
102	52.6197	28.4241	100	59.9921	79.8638	95.1363	89.776	62.2712
103	55.5775	29.1721	98.2565	64.0106	82.4862	89.8143	92.0724	64.1882
104	58.7459	30.0927	94.0129	67.7186	84.4192	85.5289	93.7421	67.2259
105	62.3677	30.3555	88.0973	71.5865	84.9661	81.9578	93.9785	70.254
106	66.3661	30.455	82.4649	74.3125	84.2172	78.9249	93.7258	73.1832
107	69.2816	30.8515	79.7835	74.8238	83.1399	76.0717	94.6685	76.0862
108	70.6123	32.1394	79.7375	73.5172	82.2983	73.3926	96.2951	78.7271
109	71.4946	34.2845	79.4376	71.4613	82.1847	70.9523	97.1051	81.1862
110	72.0219	36.0949	77.0323	70.2402	83.4452	70.356	97.815	82.8839
111	72.0252	37.3598	75.6601	70.4287	85.4171	71.2063	98.7164	83.08
112	73.3353	37.9826	76.2877	71.5296	86.0916	71.4404	99.55	82.1591
113	75.0157	38.4704	79.3836	74.2321	85.206	71.9996	100	81.5511
114	76.1652	38.7644	82.2867	77.6256	83.4551	73.0081	99.8456	80.9869
115	77.453	39.3766	83.4777	80.6461	82.9193	72.9796	99.2214	80.9925
116	79.9353	40.5958	82.8805	82.3079	84.0849	73.2661	98.3243	81.3857
117	83.2518	43.4666	83.0767	82.3966	86.8802	73.432	97.369	80.7112
118	86.9933	48.1082	83.6258	82.0245	89.3552	73.2112	95.8134	79.9521
119	89.3665	53.4516	83.3756	81.3576	90.2109	70.2669	94.756	79.2093
120	90.5483	58.6178	81.2939	79.4368	91.4266	65.0709	94.7138	78.6343
121	90.3441	64.4942	78.3336	77.673	93.0476	59.9356	93.9949	77.9055
122	88.447	70.7469	76.3722	76.5296	94.555	56.2735	92.0213	78.244
123	86.1334	74.5112	76.4803	75.7566	94.5399	51.4408	89.217	79.4023
124	84.5105	75.6035	76.251	75.151	94.5165	47.5033	86.8376	80.5617
125	83.915	75.4268	75.5968	74.0999	92.4729	46.2162	84.8054	81.2561
126	85.1657	74.7435	74.043	72.3918	89.4504	47.5915	83.237	82.4329
127	87.7765	73.5728	71.5209	70.8782	87.728	50.7623	81.9034	84.7441
128	90.7117	71.3586	68.7812	70.158	85.6334	53.5894	80.8718	88.2469
129	93.4154	68.6787	67.9307	69.593	83.4048	56.3365	80.2593	91.4458
130	95.1379	66.6068	68.1722	69.5075	81.2792	59.2834	79.9725	93.6019
131	93.9004	66.2579	69.4816	70.1401	80.0886	61.3095	79.2136	95.4826
132	92.4224	67.3443	70.9026	70.1277	80.0771	60.9919	77.4421	97.2486
133	92.0397	69.7364	72.0265	68.2152	80.5508	61.9062	75.1035	97.7919
134	91.8523	72.2282	72.6977	66.4611	82.2256	62.0989	73.4495	97.2643
135	91.6296	73.845	72.7576	65.0098	84.5064	59.2245	72.7893	95.7291
136	91.0011	73.8595	72.5507	64.5459	85.4846	55.0113	71.8396	93.5713
137	90.8179	73.2224	73.2701	63.2576	84.4421	50.1385	69.855	89.9194
138	91.6822	73.8694	73.8224	61.6628	84.3758	47.2087	67.1806	85.9226
139	94.5792	76.7865	75.0145	60.4938	84.5742	45.8124	64.5217	81.9906
140	98.0239	82.5103	76.2605	59.4922	85.2013	44.8075	62.6553	77.8505
141	100	89.8337	76.1815	58.2697	85.2563	43.0079	61.2734	74.7172
142	99.6761	96.9795	74.7591	58.1085	84.245	41.4757	59.7282	72.8712
143	98.4523	100	74.3484	57.7736	82.9249	39.6754	57.8779	71.8287
144	95.6945	99.79	73.9391	57.396	79.3931	36.6222	55.6044	71.0536
145	91.4117	97.0896	73.5741	55.9836	74.9993	32.9741	54.0836	70.2899
146	87.9129	92.3318	72.5468	54.4914	71.6007	31.1685	52.9886	68.9303
147	84.8408	88.3888	70.7981	52.5642	69.4631	30.1854	51.7999	67.4953
148	83.3408	86.0872	68.6699	50.4873	66.9797	29.2492	50.7957	66.5636
149	83.137	85.408	65.3157	48.9536	62.1486	28.63	49.8061	66.3424
150	83.6585	84.1615	62.0371	48.1267	57.9424	29.07	48.928	65.9796
151	83.7906	83.4545	59.3826	46.8054	54.8991	30.4195	48.3652	64.7692
152	82.6757	83.6697	57.5078	45.3531	54.1855	31.9163	47.7702	63.0007
153	79.9098	83.2786	56.2761	44.0214	56.5296	32.2294	47.1326	60.3847
154	77.0683	80.6369	55.0425	41.4072	58.8933	31.7523	46.3018	58.0281
155	74.5047	76.0564	54.0685	38.8394	60.4295	30.0553	45.2777	56.0936
156	72.0826	70.8562	54.156	36.9725	62.2547	28.8767	44.9901	54.8534
157	68.9581	66.9484	55.0103	35.3956	64.6831	28.9103	44.8714	53.9145
158	66.2358	64.7734	56.1482	33.5798	67.434	29.4403	44.4577	53.18
159	64.4519	62.0255	55.7572	31.5045	68.877	29.9689	43.9224	51.8666
160	62.536	57.9048	53.7482	30.6718	67.2216	30.4606	42.9682	50.0914
161	60.7379	54.9382	50.6099	30.3244	63.2866	29.9921	41.4677	48.6043
162	59.4858	52.3095	49.5102	30.5857	59.2313	29.7751	40.1715	47.2048
163	58.5103	49.3871	48.2624	30.818	56.7927	30.5243	39.2338	46.0621
164	58.0563	47.9964	46.2507	30.9799	55.6186	31.4163	38.5643	45.3281
165	58.2644	47.784	44.2381	30.6593	54.7578	32.4856	37.7939	44.7201
166	58.5789	47.7136	42.5394	29.6825	53.2669	33.0639	36.948	44.1352
167	58.2704	47.3656	40.8723	28.8603	52.2094	32.3585	37.0453	43.6095
168	56.8423	46.7644	38.3218	28.4066	51.1875	31.6835	38.2773	42.5752
169	54.7036	46.0005	35.3946	27.8491	50.3149	31.5749	39.6836	41.2096
170	52.6756	44.6954	33.2741	26.8711	49.115	31.7174	40.8313	40.1185
171	50.4148	42.839	32.8581	25.8628	47.0236	32.5198	41.2215	39.4472
172	47.7498	40.6128	33.9149	25.1583	44.0753	33.0967	41.1537	39.1998
173	45.613	39.1001	34.2762	24.8714	41.3406	32.7648	40.4899	38.5749
174	44.2286	38.8646	33.579	25.0279	40.6087	31.8895	39.4513	38.2509
175	42.5508	39.2492	32.7638	24.7779	40.8421	30.9849	38.0771	37.8602
176	40.5532	38.6899	31.4071	24.156	39.9734	29.3951	36.9073	37.3282
177	38.1726	37.1659	30.3298	23.7438	38.4198	27.7995	36.2026	36.8996
178	36.0044	35.8586	28.853	23.4126	37.526	26.4932	35.9251	36.3281
179	34.2712	35.469	28.3669	22.8346	37.8612	25.8225	35.9891	36.2217
180	33.5311	34.7996	27.7485	22.3596	38.7196	25.4682	35.9775	36.5286
181	33.3019	33.6542	27.4956	22.0615	38.9775	25.4833	35.8248	36.6084
182	33.0614	32.8631	27.2211	21.7724	37.9979	25.5869	35.6302	36.7502
183	32.7618	31.9277	26.6864	21.4612	36.3809	25.5068	35.7808	37.1104
184	32.4914	30.7033	26.3509	21.2054	33.8811	25.6111	36.0209	37.7127
185	32.0317	29.5552	26.4423	21.6945	31.6086	25.4271	36.0796	38.2497
186	31.5815	28.1439	26.8535	21.9474	30.3706	26.1248	36.1044	38.6291
187	31.5816	26.7084	27.9907	21.1039	29.7865	26.8105	36.2637	39.1469
188	31.7091	26.0102	28.4803	20.5585	29.6384	27.0096	37.0691	39.6349
189	31.7098	27.1918	28.7485	20.9171	29.1362	26.8063	37.8043	39.5993
190	31.27	29.3241	29.0451	21.3041	28.698	26.8755	38.035	38.9049
191	30.9731	31.1166	28.6182	21.2873	29.019	27.2536	37.8254	38.043
192	29.9828	30.9648	29.1515	21.4067	29.4612	27.9035	37.3646	36.9979
193	28.6828	28.0609	29.0324	21.7795	30.6429	28.0731	36.8458	35.7174
194	27.6332	24.2825	30.4565	21.9073	31.6553	29.0043	36.6639	34.67
195	26.8741	21.0107	32.4827	21.899	32.4588	32.2259	37.2325	34.5766
196	26.7525	18.9343	34.7047	21.7112	32.9032	36.3384	38.3382	34.8051
197	27.1746	17.5994	36.5103	21.0269	32.8748	39.8815	39.6468	34.7533
198	27.765	17.0918	37.5383	20.544	32.5539	42.4542	41.0649	34.6337
199	29.1087	17.4301	38.2742	20.1414	32.3727	43.0406	42.0763	34.523
200	30.7152	18.8353	38.7027	19.1401	32.8635	40.7305	42.541	34.5881
201	32.1651	20.9696	39.3862	17.7429	33.6985	36.2732	42.8261	34.7368
202	33.1354	22.2214	38.4395	16.7877	34.2989	31.3259	42.7429	34.7983
203	33.3847	21.8955	36.6293	16.4331	35.5803	28.5289	42.2327	34.4866
204	33.1663	20.5989	34.4997	16.0688	36.9	28.3292	41.5456	33.6675
205	33.0644	18.7525	32.4072	15.8618	37.4853	29.6366	41.5729	33.1681
206	32.9196	16.6449	31.9761	15.9027	37.6249	30.997	41.7857	33.1629
207	32.652	15.0497	32.1882	16.133	37.7593	31.7221	42.5699	33.6967
208	32.0476	13.7288	32.9205	16.5091	38.0137	31.423	43.4048	34.9059
209	31.1735	12.6359	33.7757	16.8323	37.6994	30.4533	43.72	35.9642
210	30.599	12.0968	34.6951	17.1602	37.1352	28.1139	43.4527	36.3301
211	30.5568	11.8973	35.6717	17.5186	36.6936	26.8487	43.3649	36.5422
212	30.2256	12.091	34.4113	17.4557	36.6751	26.11	43.2229	37.2414
213	29.5981	12.6237	33.0596	17.4361	36.7357	25.6057	43.3663	38.1769
214	29.1333	12.8616	32.6411	17.4114	36.6328	25.105	43.9489	38.8771
215	28.4404	13.0367	32.1925	17.2239	36.4494	24.6739	45.1779	38.8237
216	27.7738	13.3424	32.1226	16.7565	36.6112	23.7981	46.806	39.5658
217	27.178	13.6086	32.2535	17.0957	37.2394	22.8831	48.2021	40.7985
218	26.8241	13.7971	31.9139	17.832	38.534	21.8809	49.1904	42.5465
219	26.0467	14.0313	31.3902	18.1062	40.0116	21.7387	50.3573	44.2284
220	25.4614	14.34	30.9663	18.088	39.6083	21.8793	51.1825	45.8539
221	25.267	14.3745	30.4116	18.255	38.6483	22.7605	51.4606	47.28
222	25.5112	14	30.1058	18.2926	37.7836	23.5595	51.8529	48.7511
223	25.7244	13.4638	29.8344	18.9328	37.0459	24.2236	52.515	49.3353
224	25.6713	13.3481	29.0333	19.8264	36.7895	25.8813	53.2119	48.3925
225	25.5347	13.4261	28.2423	20.904	37.0618	27.6817	54.6481	46.9585
226	25.2371	13.7205	28.0757	22.1088	37.8574	29.22	55.7777	44.7363
227	24.644	14.0804	28.5601	22.5531	38.1901	30.5686	56.7179	41.8598
228	24.0871	14.3986	28.3832	22.3298	38.7143	31.7622	58.009	39.0121
229	23.9331	14.7843	28.5486	21.5963	39.278	32.3293	59.4094	36.6165
230	24.1007	15.0271	28.4491	21.4046	40.2312	33.4582	60.2033	34.6256
231	24.0195	15.2897	28.3452	21.7052	41.7491	35.0106	60.0356	33.0095
232	23.8625	15.3098	28.3016	22.0657	43.7978	36.9526	59.6717	32.7559
233	24.1284	15.2649	28.8591	22.5194	45.2163	38.2207	59.0119	31.1411
234	24.635	15.2	29.7843	22.8408	45.7102	39.056	62.8352	29.0218
235	25.1678	15.1672	30.46	22.8563	46.3107	39.6863	62.0669	26.8917
236	25.6144	15.2435	30.2315	22.8355	47.7255	40.6961	60.9703	25.2686
237	25.8747	14.9821	29.6839	22.6465	49.1036	41.9728	59.8718	24.7277
238	26.0698	14.4547	28.7194	22.5186	49.7301	43.5755	57.8352	24.7821
239	26.6214	13.8166	28.1469	22.3756	49.7139	43.7372	56.2594	25.0853
240	26.8522	13.3736	28.0703	22.037	50.5633	41.9844	55.0668	26.7585
241	26.7819	13.1167	28.1157	21.8398	53.3977	41.501	54.3906	28.4011
242	26.9497	12.9283	28.1507	22.2458	59.9285	41.8939	54.6365	30.6855
243	26.6029	12.851	28.3461	23.1387	67.7204	42.9084	55.5024	30.3606
244	26.4098	12.7371	28.5205	24.602	71.9002	44.8816	55.5094	29.1296
245	26.109	12.5836	29.5294	26.2632	71.1881	46.6515	54.7587	28.223
246	25.762	12.8711	30.7639	27.7674	67.7392	48.3813	54.4185	27.9542
247	25.2446	13.6337	31.7524	28.9997	63.9859	49.929	54.1011	29.5857
248	24.6416	14.4953	32.686	29.7325	59.4878	52.2696	56.7687	28.1871
249	24.2492	15.1513	32.6603	30.5721	55.1201	54.9624	56.3896	27.3265
250	24.2124	15.4101	32.2328	30.7163	53.0587	57.4249	60.6716	27.2073
251	24.6602	15.2941	32.1554	31.1181	50.5825	59.0962	59.7906	27.7375
252	25.0234	15.1107	32.1681	31.5859	50.5029	58.8337	58.4297	28.9641
253	25.4884	14.6967	32.5829	32.5554	52.701	56.8744	57.2477	31.023
254	26.5662	14.373	33.0774	33.6389	55.6815	55.1508	56.4818	33.2925
255	27.7869	14.0524	33.3194	34.7791	58.9307	53.8635	55.8598	36.4373
256	28.3603	14.1258	33.6681	36.0125	60.9592	53.379	55.2387	39.2751
257	29.217	14.6819	34.3737	36.604	62.826	54.7443	54.6583	41.0624
258	30.0243	15.5381	35.4317	36.897	65.6335	56.1468	57.7914	42.0607
259	30.0541	16.7708	36.0019	36.689	75.161	57.2302	55.7633	42.476
260	30.3902	18.2255	36.771	36.1946	76.575	58.4709	54.5145	42.8593
261	31.7776	19.0181	36.8825	35.2028	74.9164		70.9054	43.9975
262	33.2447	19.6979	37.0349	34.4509	81.0115		79.9193	45.8978
263	34.0899	20.826	37.4764	33.9046	80.1369		80.913	48.1863
264	33.6698	21.9136	37.6064	34.053	81.4105		80.7642	50.9583
265	32.1466	22.4287	38.2777	34.1074	82.0594		80.514	55.4399
266	30.6233	22.6519	38.9015	34.0328	82.9208		80.1782	60.3408
267	30.0222	22.1027	39.6827	33.6838	83.4035		79.8189	64.9401
268	30.361	21.8537	41.3554	33.3306	80.7007		79.4362	68.2366
269	30.8422	22.083	43.3231	32.9787	74.8053		79.3065	70.1928
270	31.4262	22.497	45.0145	32.5454	67.8121		79.0034	71.0231
271	31.9887	22.7819	46.6004	32.0105	60.563		77.6621	72.585
272	33.1755	23.3782	47.1365	31.552	53.9927		74.0393	75.4218
273	35.0758	24.5369	46.024	31.1312	48.5368		70.0772	80.1716
274	36.7101	25.4428	44.0768	31.0469	44.7405		67.8808	86.0269
275	37.1692	26.4254	43.4858	30.9399	43.469		66.0507	90.9762
276	35.6365	27.9414	44.1087	30.8432	48.1304		63.7142	94.2249
277	33.5313	29.324	44.1858	30.2168	48.6659		61.2876	97.0188
278	31.1117	30.4633	43.7735	29.349	50.9323		59.5759	99.3472
279	28.9746	31.5481	42.0808	29.2483	52.7964		59.5888	100
280	28.0236	31.7432	40.8959	29.056	58.9901		58.8691	98.0772
281	28.3022	30.6252	38.8606	29.2823	55.2765		56.2965	95.8976
282	29.4861	28.1316	35.8693	29.7944	51.4335		53.0984	92.901
283	30.9103	25.2123	33.5625	30.2809	47.2266		49.0538	87.1959
284	31.6153	22.9289	32.4983	30.77	45.002		45.4925	81.0541
285	31.9183	22.2464	31.9179	31.065	44.7337		43.2226	76.6999
286	31.9629	22.249	31.9669	31.0253			41.6405	83.614
287	32.5516	22.0769	33.141	30.8506			39.2534	81.1126
288	32.7242	22.0666	34.8699	30.4577			35.9317	79.0618
289	32.3392	22.1323	36.635	29.7281			32.1553	75.6757
290	31.2856	21.6454	37.3182	28.8584
291	30.1575	20.5963	37.2727	27.9116
292	28.9656	19.8371	35.8411	26.9655
293	28.0606	19.4512	33.4274	25.9346
294	27.9823	19.4235	30.9826	24.8802
295	28.768	19.8458	29.023	21.4275
296	29.6905	20.4044	26.668	21.1914
297	30.9174	20.9154	24.6212	21.2593
298	32.4786	21.581	23.1106	21.7553
299	33.5281	22.1749	21.6339	22.6051
300	34.4016	22.424	20.1766	23.264
301	36.0963	22.2875	28.4767	24.5285
302	38.4719	22.3041	41.4857	26.0041
303	40.8496	22.1141	41.9221	27.694
304	42.7938	21.4894	41.9748	30.1838
305	44.3	20.9394	42.4034	33.3396
306	45.2648	20.9536	43.7352	36.4718
307	45.1318	21.4354	44.9251	39.5016
308	44.0713	21.8174	46.0324	43.064
309	42.5797	21.739	46.5152	46.5542
310	41.5899	22.5851	46.856	50.4142
311	41.1108	24.3301	47.3926	54.8601
312	40.5494	26.2814	48.2448	58.5142
313	39.7013	28.941	49.2731	61.3242
314	39.3094	31.6711	50.7102	64.5976
315	39.5478	34.2204	51.8525	69.8039
316	40.8218	36.9118	53.4683	75.0603
317	42.2394	39.4881	55.4537	78.3566
318	43.3514	41.9778	55.9248	81.2678
319	44.324	45.1427	55.7156	83.9763
320	44.8357	46.7322	56.092	89.3635
321	44.8999	45.8962	55.1346	94.8096
322	44.014	44.4907	51.9473	98.9282
323	43.3848	43.3114	46.881	100
324	43.2365	42.3444	40.1097	98.2742
325	43.3556	41.3955	34.1026	96.5117
326	44.4534	39.2154	29.8763	94.3385
327	46.9123	36.6855	26.1059	90.1023
328	50.1047	36.3459	21.8818	83.7404
329	52.6824	36.0358	18.8826	78.7973
330	54.7958	35.848	30.9019	74.6255
331	56.6989	37.1783	29.8328	71.6213
332	57.6123	40.0494	27.3424	68.0055
333	57.0378	42.6936	25.4679	63.208
334	54.8131	44.8661	23.9818	57.7278
335	51.4858	45.7776	21.8486	50.6549
336	47.1625	46.3808	19.7281	44.1443
337	42.3559	46.8076	17.3875	37.3431
338	38.7891	46.5891		30.5455
339	36.7416	45.8663		24.3683
340	35.2433	44.6031		19.7713
341	33.8649	43.1507		15.8522
342	31.8334	42.2485		17.6835
343	29.6779	42.2663		14.1267
344	28.7394	42.5477		10.868
345	32.9185	42.3603		10.4521
346	34.6117	41.2459		8.05976
347	36.4509	40.4897		7.31287
348	37.8696	40.6882		5.01828

## Sheet:  Fig.5B3
Distance	WT				Kif7 -/-
Ventricle to deep cIN stream	142	143	104	119	126	102	115	136
Between ventricle	190	195	218	206	143	159	150	145

## Sheet: Fig.6A3
Speed (µm/h) WT	Speed (µm/h) Kif7 -/-
30.0021	71.9248
43.1635	51.5305
27.4008	50.1127
47.9691	25.4602
56.4141	46.6058
31.3493	50.9537
70.5593	43.5194
14.2438	44.192
42.1629	33.5223
76.8306	57.7453
59.8598	52.1206
42.8705	22.5592
58.7119	58.7949
35.516	49.0064
43.5044	44.3755
75.5149	49.2475
22.0067	47.0367
51.7833	46.46
29.65	87.3667
68.2567	55.56
38.7767	67.63
45.88	44.9067
36.72	68.5933
57.5367	51.66
43.07	56.8133
71.7733	45.3667
39.7233	83.0133
46.7133	65.84
55.8133	77.3533
51.9133	79.82
42.1567	41.62
64.9767	34.2233
47.7433	59.68
45.9667	65.5833
66.32	38.19
82.2767	36.1633
65.4667	69.4333
	81.2133
31.0757	27.57
20.1904	49.95
29.176	121.25
50.6074	46.7867
36.3496	54.2367
39.4484	44.9633
52.162	66.68
36.6256	74.8367
52.1385	54.0333
42.5991
28.2886	20.5459
46.9723	54.1609
38.5928	38.1207
52.3927	47.5545
51.7466	44.59
62.1604	44.9092
51.19	69.2815
24.76	41.8998
19.36	56.3071
54.54	66.2603
53.4433	60.1326
50.7267	32.4247
48.18	65.4645
59.1467	32.5085
66.2567	59.3594
56.0833	49.1155
47.48	80.1833
40.0467	72.8167
65.0767	67.2633
70.2033	73.7467
61.35	54.8367
59.8067	48.2433
61.0767	42.18
53.8633	58.2567
27.1333	31.6967
35.8433	46.9133
59.69	39.3267
42.7	44.4133
45.88	30.8833
44.2867	69.29
64.35	50.5
57.21	85.21
60.4433	46.2167
43.42	56.3167
57.6033	78.4467
33.8033	73.19
52.47	44.1533
68.9833	80.8833
62.5933	76.2633
47.8591	67.82
40.1162	51.3
38.7688	63.0133
96.1982	25.8767
43.2441
60.9878	32.409
60.9719	53.1042
14.7109	28.4573
18.8286	78.2429
64.8374	38.704
22.3211	50.552
	52.7858
68.5193	87.4057
51.0135	68.3885
50.9535	74.6802
51.8516	44.8015
	70.1728
67.3624	49.1422
56.9755	51.1848
69.2259	32.6334
61.3162	47.9117
51.0154	43.2
42.0918	35.83
44.8792	42.9833
61.3871	82.15
56.3656	52.7367
54.353	31.3033
43.311	57.9033
54.8971	43.1533
44.3434	48.4833
39.5024	102.25
21.1455	46.61
71.0548	31.08
71.38	60.07
43.3333	53.9067
26.6367	56.0633
52.8567	51.1333
51.4733	47.1367
52.6033	62.7533
32.8467	7.32667
41.2033	62.0533
41.21
63.8567
29.0367
37.88
30.09
43.89
60.91
24.82
54.6633
48.7733
40.37
53.0133
35.4267
98.4567
31.7933
94.4467
55.1767
46.0133
47.4967
43.4833
51.4967
47.6367
51.3633
60.0367
32.4867
82.7584
43.9821
31.4979
69.7544
56.7683
26.5032
50.3706
81.3527
39.0685
47.6503

## Sheet: Fig.6A4
Time without nuclear movement (% tracking duration)
WT	Kif7 -/-
66.443	41.4894
64.4295	39.8649
71.8121	51.5464
57.8231	59.2593
53.0201	57.7181
63.0872	59.4595
38.255	61.3793
85.7143	50
65.2482	47.7477
28.5714	46.8354
53.4483	53.0201
61.0738	61.0169
38.5321	46.3087
75	48.7603
55.0336	61.5942
38.3562	52.4272
72.4832	55.0336
58.1081	52.349
75.8389	34.5455
28.5714	48.3221
63.6364	45.4545
61.745	56.7164
52.8571	29.8507
54.5455	38.3721
68	43.2099
39.6226	46.5347
59.2857	15.7895
37.8378	37.7778
51.0204	45.2055
50.4065	25.5814
61.6822	68.75
29.1667	58.7838
55.5556	42.953
63.2	57.6923
32.4675	63.7584
31.1475	65.035
44.4444	44.7552
0	30.1724
72.1429	63.7584
80.5369	34.8315
68.4564	5.88235
50.3356	60.9524
60.4027	53.0201
61.0738	58.3893
30.4348	43.6242
54.3624	32.3944
55.2632	37.6623
48.9933	0
66.8919	79.1946
64.8649	56.7376
63.0435	64.4295
59.0604	40.9091
59.4203	34.9206
47.0588	55
58.3893	42.5676
70.4698	59.0604
77.8523	49.3243
58.3893	44.3299
54.8077	44.9664
60.6061	68.4564
64.1509	35.6436
58.2609	61.6
46.9799	42.2819
56.1905	53.3898
63.0872	28.125
63.7584	40
56.7797	41.7582
50.3356	38.5135
45.7944	40.9639
58.042	56.25
46.3087	54.7368
52.4752	43.3333
79.4872	62.8319
58.3893	60
50.4425	60.4027
57.1429	51.6779
53.913	65.1163
59.7315	48.7179
63.5417	65.2174
58.7719	46.1538
48.7805	65.873
56.8345	47.651
47.1264	40.2778
67.7852	36.3636
54.8387	60.1504
36.9369	40.9091
45.614	52.5641
56.7308	44
59.7122	46.6667
64.4295	30.7692
15.3846	72.4832
61.8557	0
50	67.1141
43.9394	41.6107
80.3279	68.2432
71.1409	50
48.4536	64
83.2215	55.6962
0	56.8627
44.2308	17.8571
54.4776	42.963
47.4576	51.4706
46.6667	61.0687
0	52.9412
42.2819	59.7315
58	65.0685
35.514	58.3893
55	61.0738
53.9823	72.043
55.0336	61.9048
56.3758	50
51.0067	46.4789
46.6667	48.1013
37.5	43.75
67.7852	51.2195
47.9167	70.9459
62.4161	59.7315
56.25	23.8095
75.8389	62.1849
43.4783	67.1875
50	56.4103
57.7586	62.5
71.1409	53.8462
52.4823	51.8797
67.0455	56.1798
61.0738	53.2468
65.1007	68.4211
73.1544	49.1228
57.8571
48.8889
51.7241
65.1007
77.8523
60.4027
51.7544
75.1678
61.1111
54.2373
58.2418
51.1628
75.7895
44.1176
72.4832
40
45.2703
55.5556
58.7838
60
61.9718
55.102
68.1818
54.3624
65.2174
34.1463
59
63.7584
43.4783
47.4074
78.7611
61.0169
42.1053
68.8889
52.2523

[truncated: 11 more sheets: Fig.6A5, Fig.6A6, Fig.6A7, Fig.6B2, Fig.6B4 Deep stream, Fig.6B4 Cortical plate, Fig.6B5 Deep stream, Fig.6B5 Cortical plate, Fig.6B6 Deep stream, Fig.6B6 Cortical plate A CHANGE, Fig.7C3]
